# Supplementary material
Source: publisher figshare collection journal article supplement (https://asha.figshare.com/articles/dataset/_/19119356)
Supplement: Supplementary file 1 [file 1]

**Supplemental Material S5.** Frequency (proportion) of errors produced by each participant with aphasia across five experimental conditions.

| ID  | Condition | Semantic | Description | Mixed   | Formal  | Nonword Phon. Related | Nonword Phon. Unrelated | Unrelated | Misc.   | No Response |
|-----|-----------|----------|-------------|---------|---------|-----------------------|-------------------------|-----------|---------|-------------|
| A01 | Neutral 1 | 2 (.67)  | 0 (0)       | 0 (0)   | 0 (0)   | 0 (0)                 | 0 (0)                   | 0 (0)     | 1 (.33) | 0 (0)       |
|     | Neg       | 2 (.40)  | 1 (.20)     | 0 (0)   | 0 (0)   | 0 (0)                 | 0 (0)                   | 0 (0)     | 0 (0)   | 2 (.40)     |
|     | Neutral 2 | 1 (.50)  | 0 (0)       | 0 (0)   | 0 (0)   | 0 (0)                 | 0 (0)                   | 0 (0)     | 0 (0)   | 1 (.50)     |
|     | Pos       | 2 (.40)  | 0 (0)       | 0 (0)   | 0 (0)   | 0 (0)                 | 0 (0)                   | 0 (0)     | 0 (0)   | 3 (.60)     |
|     | Neutral 3 | 1 (.47)  | 0 (0)       | 1 (.50) | 0 (0)   | 0 (0)                 | 0 (0)                   | 0 (0)     | 0 (0)   | 0 (0)       |
|     | Total     | 9 (.45)  | 1 (.06)     | 1 (.06) | 0 (0)   | 0 (0)                 | 0 (0)                   | 0 (0)     | 1 (.06) | 6 (.35)     |
| A03 | Neutral 1 | 2 (.67)  | 0 (0)       | 1 (.33) | 0 (0)   | 0 (0)                 | 0 (0)                   | 0 (0)     | 0 (0)   | 0 (0)       |
|     | Neg       | 2 (.22)  | 2 (.22)     | 0 (0)   | 0 (0)   | 1 (.11)               | 1 (.11)                 | 1 (.11)   | 1 (.11) | 1 (.11)     |
|     | Neutral 2 | 3 (.50)  | 0 (0)       | 0 (0)   | 2 (.33) | 0 (0)                 | 0 (0)                   | 0 (0)     | 0 (0)   | 1 (.17)     |
|     | Pos       | 2 (.33)  | 1 (.17)     | 0 (0)   | 1 (.17) | 0 (0)                 | 1 (.17)                 | 0 (0)     | 0 (0)   | 1 (.17)     |
|     | Neutral 3 | 1 (.14)  | 0 (0)       | 0 (0)   | 1 (.14) | 2 (.29)               | 0 (0)                   | 0 (0)     | 1 (.14) | 2 (.29)     |
|     | Total     | 10 (.32) | 3 (.10)     | 1 (.03) | 4 (.13) | 3 (.10)               | 2 (.06)                 | 1 (.03)   | 2 (.06) | 5 (.16)     |
| A04 | Neutral 1 | 0 (0)    | 0 (0)       | 0 (0)   | 0 (0)   | 2 (.67)               | 0 (0)                   | 0 (0)     | 0 (0)   | 1 (.33)     |
|     | Neg       | 2 (.50)  | 0 (0)       | 0 (0)   | 0 (0)   | 1 (.25)               | 0 (0)                   | 0 (0)     | 0 (0)   | 0 (0)       |
|     | Neutral 2 | 2 (.40)  | 0 (0)       | 0 (0)   | 1 (.20) | 1 (.20)               | 0 (0)                   | 1 (.20)   | 0 (0)   | 0 (0)       |
|     | Pos       | 1 (.20)  | 1 (.20)     | 0 (0)   | 0 (0)   | 2 (.40)               | 1 (.20)                 | 0 (0)     | 0 (0)   | 0 (0)       |
|     | Neutral 3 | 1 (.25)  | 0 (0)       | 0 (0)   | 1 (.25) | 0 (0)                 | 0 (0)                   | 0 (0)     | 0 (0)   | 1 (.25)     |
|     | Total     | 6 (.29)  | 1 (.05)     | 0 (0)   | 2 (.10) | 6 (.29)               | 1 (.05)                 | 1 (.05)   | 0 (0)   | 2 (.10)     |
| A05 | Neutral 1 | 1 (.50)  | 1 (.50)     | 0 (0)   | 0 (0)   | 0 (0)                 | 0 (0)                   | 0 (0)     | 0 (0)   | 0 (0)       |
|     | Neg       | 4 (.57)  | 0 (0)       | 1 (.14) | 0 (0)   | 2 (.29)               | 0 (0)                   | 0 (0)     | 0 (0)   | 0 (0)       |
|     | Neutral 2 | 1 (.50)  | 0 (0)       | 0 (0)   | 1 (.50) | 0 (0)                 | 0 (0)                   | 0 (0)     | 0 (0)   | 0 (0)       |
|     | Pos       | 0 (0)    | 0 (0)       | 0 (0)   | 0 (0)   | 1 (1.00)              | 0 (0)                   | 0 (0)     | 0 (0)   | 0 (0)       |
|     | Neutral 3 | 1 (.50)  | 0 (0)       | 0 (0)   | 0 (0)   | 0 (0)                 | 0 (0)                   | 0 (0)     | 0 (0)   | 1 (.50)     |
|     | Total     | 7 (.50)  | 1 (.07)     | 1 (.07) | 1 (.07) | 3 (.21)               | 0 (0)                   | 0 (0)     | 0 (0)   | 1 (.07)     |
| A06 | Neutral 1 | 0 (NA)   | 0 (NA)      | 0 (NA)  | 0 (NA)  | 0 (NA)                | 0 (NA)                  | 0 (NA)    | 0 (NA)  | 0 (NA)      |
|     | Neg       | 2 (1.00) | 0 (0)       | 0 (0)   | 0 (0)   | 0 (0)                 | 0 (0)                   | 0 (0)     | 0 (0)   | 0 (0)       |
|     | Neutral 2 | 0 (0)    | 0 (0)       | 0 (0)   | 0 (0)   | 0 (0)                 | 0 (0)                   | 1 (1.00)  | 0 (0)   | 0 (0)       |
|     | Pos       | 1 (1.00) | 0 (0)       | 0 (0)   | 0 (0)   | 0 (0)                 | 0 (0)                   | 0 (0)     | 0 (0)   | 0 (0)       |
|     | Neutral 3 | 1 (1.00) | 0 (0)       | 0 (0)   | 0 (0)   | 0 (0)                 | 0 (0)                   | 0 (0)     | 0 (0)   | 0 (0)       |
|     | Total     | 4 (.80)  | 0 (0)       | 0 (0)   | 0 (0)   | 0 (0)                 | 0 (0)                   | 1 (.20)   | 0 (0)   | 0 (0)       |
| A08 | Neutral 1 | 0 (0)    | 0 (0)       | 2 (.40) | 1 (.20) | 1 (.20)               | 0 (0)                   | 0 (0)     | 0 (0)   | 1 (.20)     |
|     | Neg       | 2 (.20)  | 1 (.10)     | 1 (.10) | 2 (.20) | 2 (.20)               | 0 (0)                   | 1 (.10)   | 0 (0)   | 1 (.10)     |
|     | Neutral 2 | 2 (.20)  | 0 (0)       | 0 (0)   | 4 (.40) | 3 (.30)               | 0 (0)                   | 0 (0)     | 0 (0)   | 1 (.10)     |
|     | Pos       | 1 (.17)  | 1 (.17)     | 1 (.17) | 0 (0)   | 0 (0)                 | 0 (0)                   | 1 (.17)   | 0 (0)   | 2 (.33)     |
|     | Neutral 3 | 2 (.5)   | 0 (0)       | 0 (0)   | 0 (0)   | 0 (0)                 | 2 (.50)                 | 0 (0)     | 0 (0)   | 0 (0)       |
|     | Total     | 7 (.20)  | 2 (.06)     | 4 (.11) | 7 (.20) | 6 (.17)               | 2 (.06)                 | 2 (.06)   | 0 (0)   | 5 (.14)     |
| A09 | Neutral 1 | 0 (0)    | 0 (0)       | 0 (0)   | 1 (.50) | 0 (0)                 | 0 (0)                   | 1 (.50)   | 0 (0)   | 0 (0)       |
|     | Neg       | 2 (.29)  | 2 (.29)     | 0 (0)   | 0 (0)   | 0 (0)                 | 2 (.29)                 | 0 (0)     | 1 (.14) | 0 (0)       |

|     |           |          |         |         |         |         |         |         |         |          |
|-----|-----------|----------|---------|---------|---------|---------|---------|---------|---------|----------|
| A10 | Neutral 2 | 0 (NA)   | 0 (NA)  | 0 (NA)  | 0 (NA)  | 0 (NA)  | 0 (NA)  | 0 (NA)  | 0 (NA)  | 0 (NA)   |
|     | Pos       | 2 (.67)  | 0 (0)   | 0 (0)   | 1 (.33) | 0 (0)   | 0 (0)   | 0 (0)   | 0 (0)   | 0 (0)    |
|     | Neutral 3 | 2 (.67)  | 0 (0)   | 0 (0)   | 0 (0)   | 0 (0)   | 1 (.33) | 0 (0)   | 0 (0)   | 0 (0)    |
|     | Total     | 6 (.40)  | 2 (.13) | 0 (0)   | 2 (.13) | 0 (0)   | 3 (.20) | 1 (.07) | 1 (.07) | 0 (0)    |
|     | Neutral 1 | 5 (.45)  | 0 (0)   | 0 (0)   | 0 (0)   | 1 (.09) | 0 (0)   | 0 (0)   | 0 (0)   | 5 (.45)  |
|     | Neg       | 2 (.20)  | 4 (.40) | 1 (.10) | 0 (0)   | 0 (0)   | 0 (0)   | 1 (.10) | 0 (0)   | 2 (.20)  |
|     | Neutral 2 | 3 (.50)  | 0 (0)   | 1 (.17) | 0 (0)   | 0 (0)   | 0 (0)   | 0 (0)   | 0 (0)   | 2 (.33)  |
|     | Pos       | 1 (.50)  | 0 (0)   | 0 (0)   | 0 (0)   | 0 (0)   | 0 (0)   | 1 (.50) | 0 (0)   | 0 (0)    |
|     | Neutral 3 | 6 (.50)  | 1 (.08) | 1 (.08) | 0 (0)   | 1 (.08) | 1 (.08) | 0 (0)   | 1 (.08) | 1 (.08)  |
|     | Total     | 17 (.41) | 5 (.12) | 3 (.07) | 0 (0)   | 2 (.07) | 1 (.02) | 2 (.05) | 1 (.02) | 10 (.24) |

*Note.* NA = not applicable because no errors were produced by the participant in the given condition. Phon. = phonologically.
